# Supplementary material
Source: PubMed Central journal article supplement (PMC3124234)

# Supplemental Figure 1

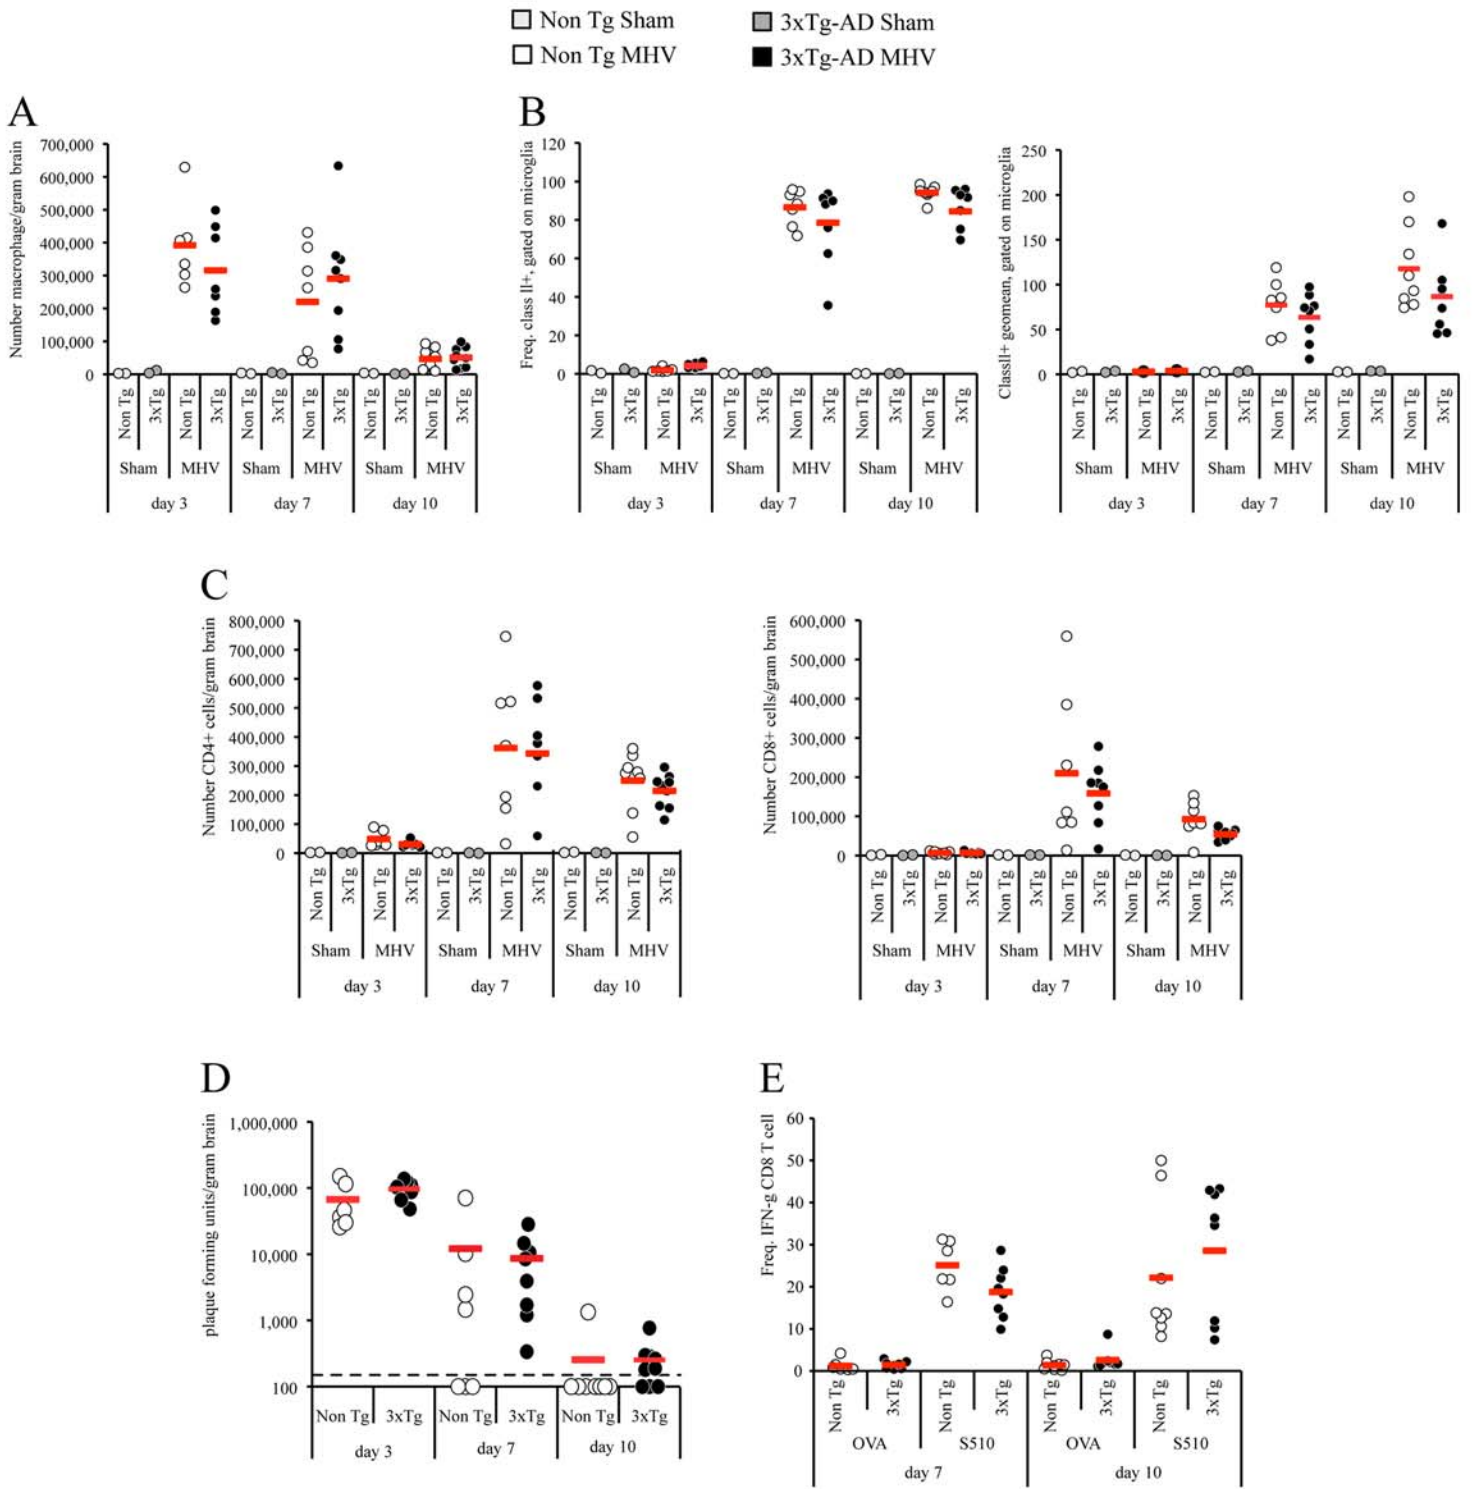

Supplement: mmc1.pdf [file mmc1.pdf]

## Supplemental Figure 2

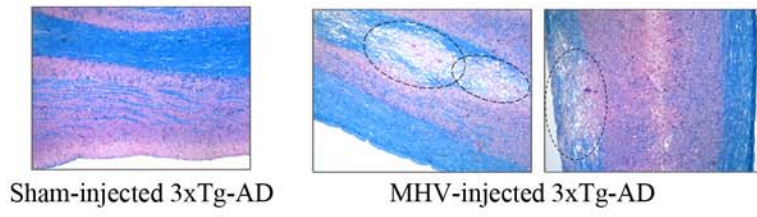

Supplement: mmc2.pdf [file mmc2.pdf]

### Supplemental Figure 3

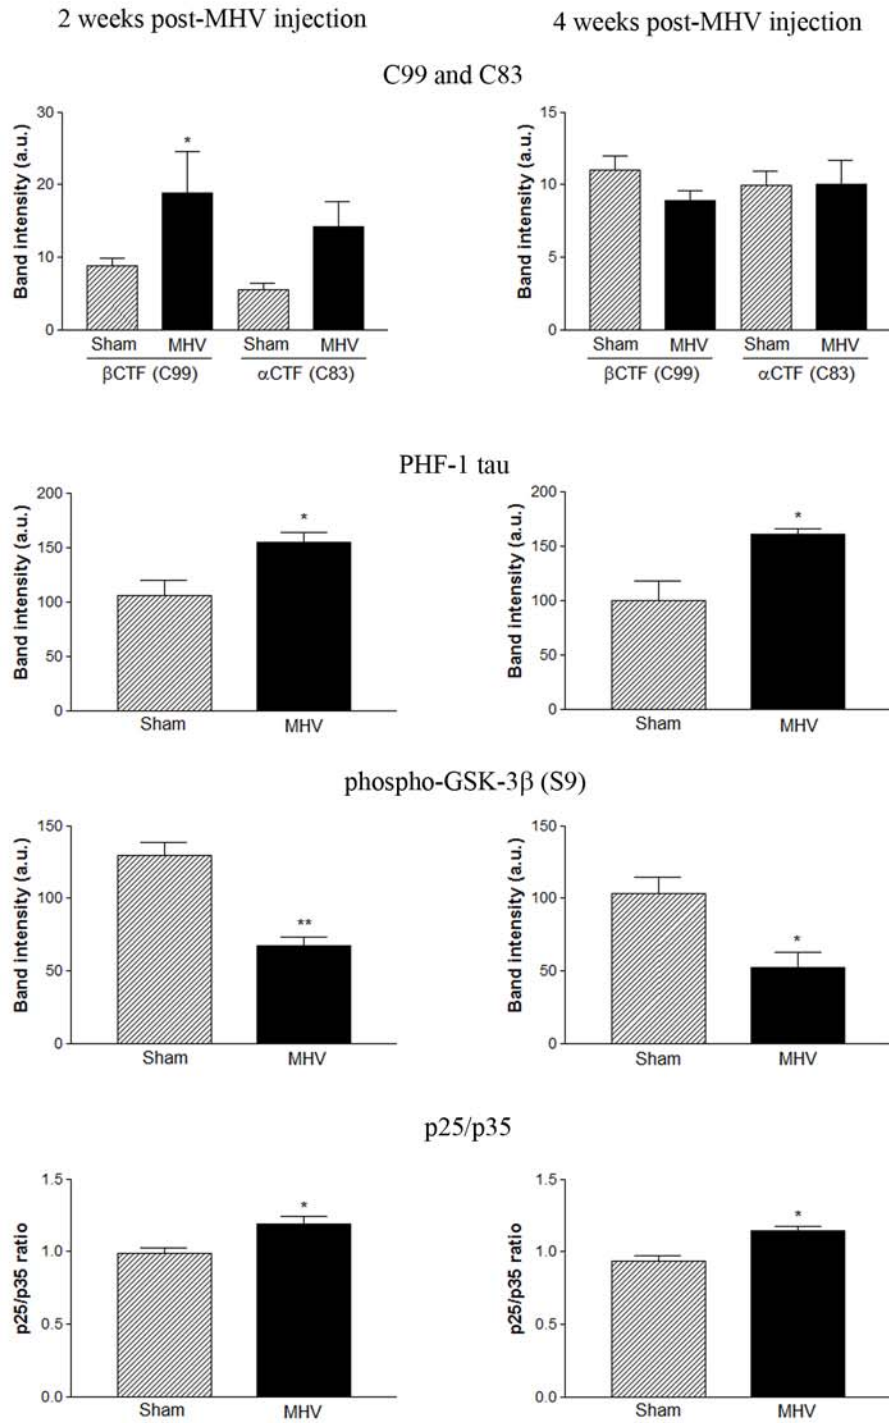

Supplement: mmc3.pdf [file mmc3.pdf]

## Supplemental Figure 4

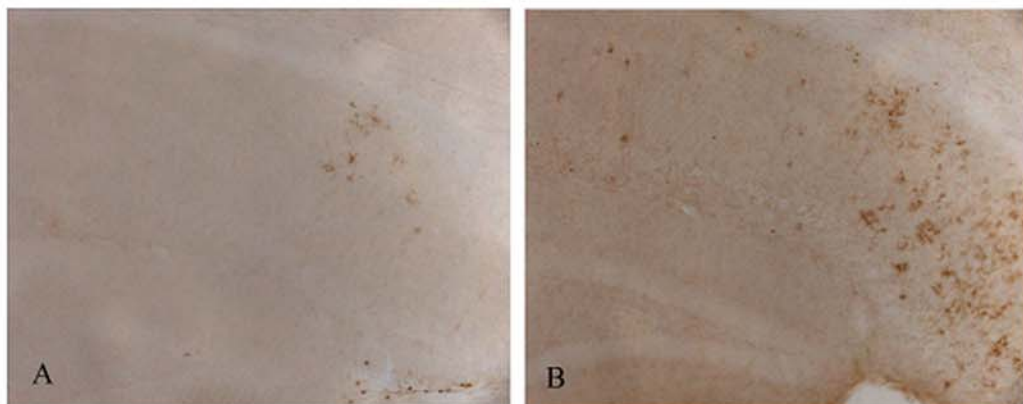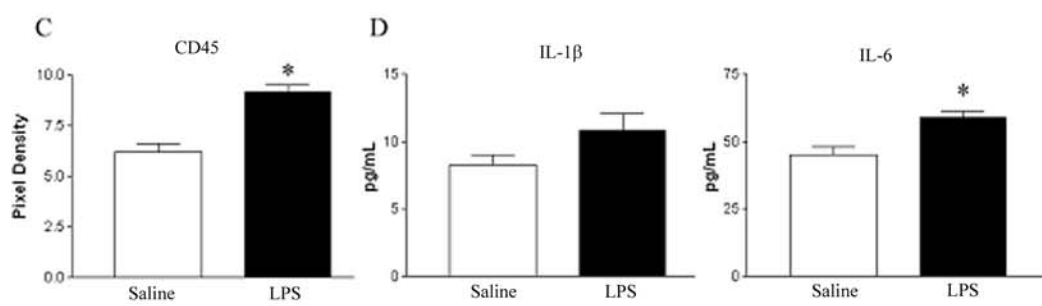

Supplement: mmc4.pdf [file mmc4.pdf]

Supplemental Figure 5

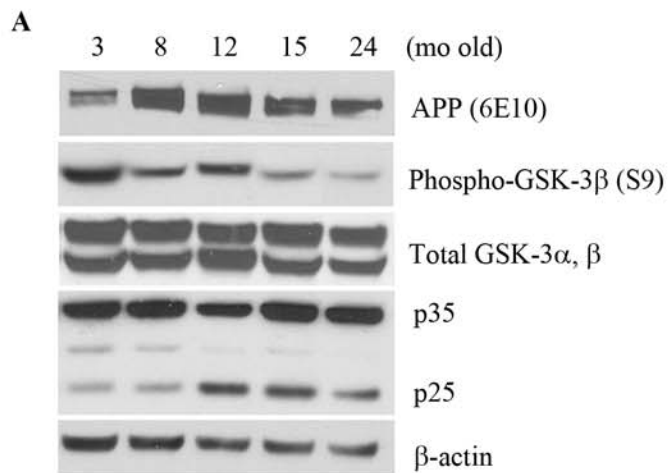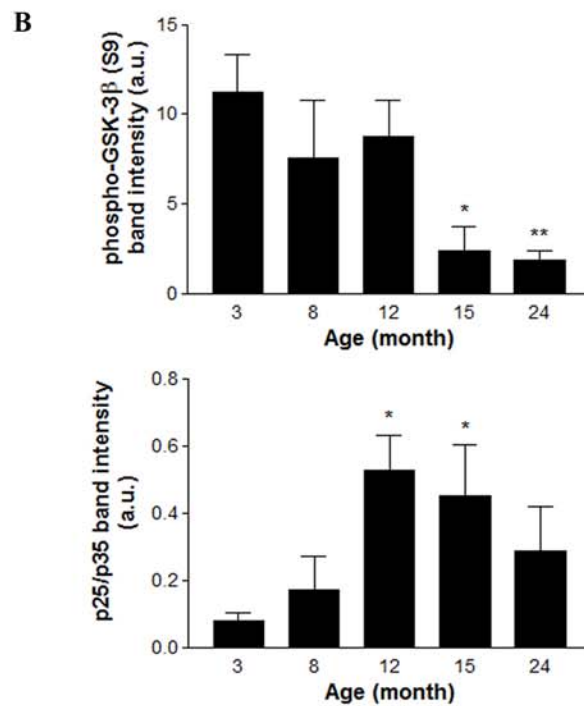

Supplement: mmc5.pdf [file mmc5.pdf]

# Supplemental Figure 6

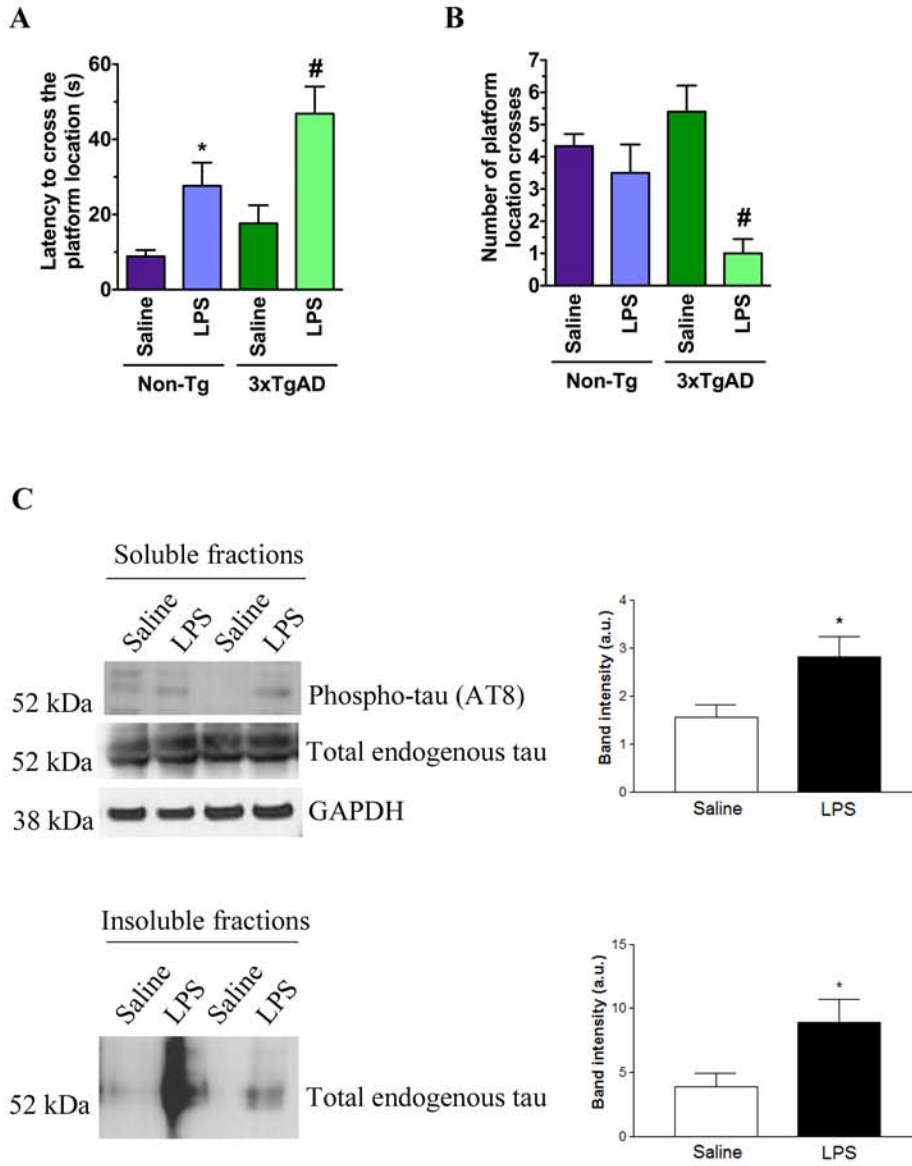

Supplement: mmc6.pdf [file mmc6.pdf]
